# Supplementary material for: The Influence of Maternal Dietary Patterns on Body Mass Index and Gestational Weight Gain in Urban Black South African Women
Source: MDPI journal article supplement (doi:10.3390/nu9070732), 2017-07-11
Supplement: s1 [file s1]

**Supplementary figure S1:** Scree plot of eigenvalues after principal component analysis

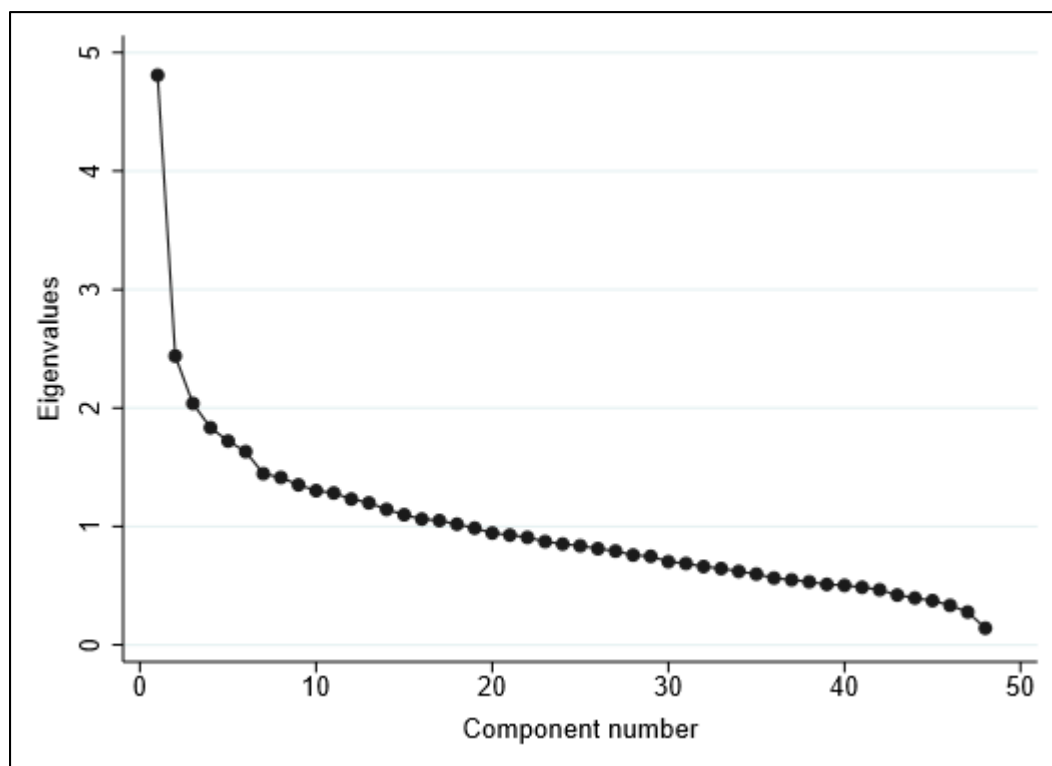

**Supplementary table S1:** Associations between maternal characteristics and dietary pattern scores (n=538)

| Variable                                                   | Dietary pattern            |                          |                           |
|------------------------------------------------------------|----------------------------|--------------------------|---------------------------|
|                                                            | Western                    | Traditional              | Mixed                     |
| <i>Maternal characteristics</i>                            |                            |                          |                           |
| <i>Age, y</i>                                              |                            |                          |                           |
| <25                                                        | 0.68 ± 2.27                | -0.16 ± 1.78             | 0.10 ± 1.66               |
| 25-29                                                      | 0.21 ± 2.12                | -0.21 ± 1.81             | -0.06 ± 1.52              |
| 30-34                                                      | -0.22 ± 1.96 <sup>b</sup>  | 0.10 ± 1.68              | 0.06 ± 1.69               |
| 35-39                                                      | -0.47 ± 1.64 <sup>b</sup>  | 0.37 ± 1.84              | -0.00 ± 1.65              |
| ≥40                                                        | -0.97 ± 1.36 <sup>bc</sup> | 0.03 ± 1.36              | -0.30 ± 1.41              |
| P-value <sup>a</sup>                                       | <b>&lt;0.001</b>           | 0.094                    | 0.745                     |
| <i>Parity</i>                                              |                            |                          |                           |
| Para 0                                                     | 0.15 ± 1.97                | -0.39 ± 1.40             | -0.11 ± 1.38              |
| Para 1                                                     | 0.23 ± 2.12                | 0.22 ± 1.91 <sup>e</sup> | 0.20 ± 1.74               |
| Para ≥2                                                    | -0.44 ± 1.93 <sup>d</sup>  | -0.00 ± 1.74             | -0.19 ± 1.57 <sup>f</sup> |
| P-value <sup>a</sup>                                       | <b>0.003</b>               | <b>0.006</b>             | <b>0.034</b>              |
| <i>HIV status</i>                                          |                            |                          |                           |
| HIV-negative                                               | -0.06 ± 2.05               | -0.03 ± 1.67             | 0.05 ± 1.56               |
| HIV-positive (pre-pregnancy ART)                           | 0.23 ± 2.19                | 0.40 ± 2.20              | -0.02 ± 1.81              |
| HIV-positive (antenatal ART)                               | 0.05 ± 1.92                | -0.13 ± 1.73             | -0.14 ± 1.64              |
| P-value <sup>a</sup>                                       | 0.560                      | 0.126                    | 0.538                     |
| <i>Smokes/chews tobacco</i>                                |                            |                          |                           |
| No                                                         | -0.02 ± 2.06               | 0.03 ± 1.76              | 0.06 ± 1.63               |
| Yes                                                        | 0.15 ± 1.91                | -0.23 ± 1.71             | -0.42 ± 1.40              |
| P-value <sup>a</sup>                                       | 0.512                      | 0.239                    | <b>0.019</b>              |
| <i>Socioeconomic characteristics</i>                       |                            |                          |                           |
| <i>Maternal education</i>                                  |                            |                          |                           |
| Primary                                                    | -1.54 ± 1.29               | -0.41 ± 1.29             | 0.15 ± 1.92               |
| Secondary                                                  | -0.07 ± 2.05               | -0.01 ± 1.74             | -0.04 ± 1.64              |
| Tertiary                                                   | 0.28 ± 2.01 <sup>s</sup>   | 0.06 ± 1.84              | 0.08 ± 1.53               |
| P-value <sup>a</sup>                                       | <b>0.011</b>               | 0.704                    | 0.700                     |
| <i>Marital status (n=509)</i>                              |                            |                          |                           |
| Single                                                     | 0.15 ± 2.15                | -0.14 ± 1.66             | 0.07 ± 1.61               |
| Married/cohabiting                                         | -0.24 ± 1.84               | 0.20 ± 1.88              | -0.08 ± 1.61              |
| P-value <sup>a</sup>                                       | <b>0.035</b>               | <b>0.032</b>             | 0.315                     |
| <i>Household SES</i>                                       |                            |                          |                           |
| Low                                                        | -0.10 ± 2.15               | 0.00 ± 1.75              | -0.67 ± 1.59              |
| Medium                                                     | 0.00 ± 2.01                | 0.03 ± 1.77              | 0.11 ± 1.61 <sup>h</sup>  |
| High                                                       | 0.22 ± 1.82                | -0.44 ± 1.57             | 0.15 ± 1.30 <sup>i</sup>  |
| P-value <sup>a</sup>                                       | 0.759                      | 0.353                    | <b>&lt;0.001</b>          |
| <i>Anthropometry</i>                                       |                            |                          |                           |
| <i>BMI at recruitment, kg/m<sup>2</sup> (&lt;14 weeks)</i> |                            |                          |                           |
| Normal weight                                              | 0.06 ± 2.06                | 0.10 ± 1.91              | 0.09 ± 1.62               |
| Overweight                                                 | -0.09 ± 1.98               | -0.12 ± 1.63             | -0.15 ± 1.47              |
| Obese                                                      | 0.03 ± 2.09                | 0.02 ± 1.72              | 0.06 ± 1.75               |
| P-value <sup>a</sup>                                       | 0.736                      | 0.460                    | 0.289                     |

Gestational weight gain (GWG), kg/w

Normal weight

|                      |              |              |             |
|----------------------|--------------|--------------|-------------|
| Inadequate (<0.35)   | -0.29 ± 2.02 | 0.22 ± 2.11  | 0.04 ± 1.73 |
| Adequate (0.35-0.50) | -0.09 ± 2.01 | 0.43 ± 2.02  | 0.27 ± 1.51 |
| Excessive (>0.50)    | 0.44 ± 2.09  | -0.21 ± 1.63 | 0.01 ± 1.63 |
| P-value <sup>a</sup> | 0.117        | 0.152        | 0.313       |

Overweight

|                      |              |              |              |
|----------------------|--------------|--------------|--------------|
| Inadequate (<0.23)   | -0.31 ± 1.55 | 0.10 ± 1.50  | -0.47 ± 1.40 |
| Adequate (0.23-0.33) | -0.19 ± 1.93 | -0.08 ± 1.66 | -0.48 ± 1.20 |
| Excessive (>0.33)    | 0.01 ± 2.12  | -0.20 ± 1.67 | 0.04 ± 1.52  |
| P-value <sup>a</sup> | 0.656        | 0.597        | 0.064        |

Obese

|                                |              |              |              |
|--------------------------------|--------------|--------------|--------------|
| Inadequate GWG, kg/w (<0.17)   | 0.21 ± 2.32  | 0.06 ± 2.05  | -0.01 ± 1.96 |
| Adequate GWG, kg/w (0.17-0.27) | 0.18 ± 2.29  | -0.28 ± 1.37 | 0.03 ± 1.50  |
| Excessive GWG, kg/w (>0.27)    | -0.06 ± 1.97 | 0.09 ± 1.69  | 0.10 ± 1.75  |
| P-value <sup>a</sup>           | 0.742        | 0.614        | 0.951        |

Dietary pattern scores presented as mean ±SD

Normal weight, BMI 18.5-24.9kg/m<sup>2</sup>; overweight, BMI 25-29.9kg/m<sup>2</sup>; obese, BMI ≥30kg/m<sup>2</sup>

<sup>a</sup> T-independent test (two groups) or analysis of variance (ANOVA) (more than two groups)

<sup>b</sup> Tukey post-hoc test: P<0.01 vs. <25 years <sup>c</sup> Tukey post-hoc test: P<0.05 vs. 25-29 years

<sup>d</sup>Tukey post-hoc test: P<0.05 vs. para 0; P<0.01 vs. para 1 <sup>e</sup>Tukey post-hoc test: P<0.01 vs. para 0 <sup>f</sup>Tukey post-hoc test: P<0.05 vs. para 1

<sup>g</sup>Tukey post-hoc test: P<0.05 vs. primary education

<sup>h</sup>Tukey post-hoc test: P<0.001 vs. low SES <sup>i</sup>Tukey post-hoc test: P<0.05 vs. low SE
